# Supplementary material for: Optimization of carton recycling site selection using particle swarm optimization algorithm considering residents’ recycling willingness
Source: PeerJ Comput Sci. 2023 Aug 24;9:e1519. doi: 10.7717/peerj-cs.1519 (PMC10495949; doi:10.7717/peerj-cs.1519)
Supplement: Supplemental Information 3 [file peerj-cs-09-1519-s003.xlsx]

## Sheet: Sheet1
Residents No.	X coordinate	Y coordinate	Weight of cartons owned by residents(Kg)	Recycling price psychological expectations(CNY/Kg)
1	35	35	16	0.5
2	41	49	15	0.6
3	35	17	11	1
4	55	45	12	0.7
5	55	20	17	1.1
6	15	30	13	0.7
7	25	30	15	0.7
8	20	50	13	0.7
9	10	43	15	1
10	55	60	15	0.7
11	30	60	17	0.6
12	20	65	15	1
13	50	35	14	1.1
14	30	25	16	1
15	15	10	16	1
16	30	5	10	0.5
17	10	20	15	0.7
18	5	30	14	0.6
19	20	40	14	0.8
20	15	60	12	0.8
21	45	65	12	0.8
22	45	20	16	0.8
23	45	10	12	1.1
24	55	5	15	0.9
25	65	35	10	1
