# Supplementary material for: Optimization of carton recycling site selection using particle swarm optimization algorithm considering residents’ recycling willingness
Source: PeerJ Comput Sci. 2023 Aug 24;9:e1519. doi: 10.7717/peerj-cs.1519 (PMC10495949; doi:10.7717/peerj-cs.1519)
Supplement: Supplemental Information 4 [file peerj-cs-09-1519-s004.xlsx]

## Sheet: Sheet1
Residents No.	X coordinate	Y coordinate	Weight of cartons owned by residents(Kg)	Recycling price psychological expectations(CNY/Kg)
1	35	35	8	1.1
2	65	20	11	1.1
3	5	30	6	0.8
4	35	40	6	1.1
5	41	37	9	0.6
6	64	42	9	1.1
7	40	60	12	1
8	31	52	3	0.6
9	35	69	8	0.8
10	53	52	9	0.8
11	65	55	12	0.7
12	63	65	13	0.6
13	2	60	14	0.5
14	20	20	7	0.7
15	5	5	9	1.1
16	60	12	4	0.6
17	40	25	7	1.1
18	42	7	9	0.7
19	24	12	10	0.6
20	23	3	12	1.2
21	11	14	11	0.8
22	6	38	14	0.7
23	2	48	3	1.1
24	8	56	13	0.7
25	13	52	6	0.6
