# Supplementary material for: Optimization of carton recycling site selection using particle swarm optimization algorithm considering residents’ recycling willingness
Source: PeerJ Comput Sci. 2023 Aug 24;9:e1519. doi: 10.7717/peerj-cs.1519 (PMC10495949; doi:10.7717/peerj-cs.1519)
Supplement: Supplemental Information 5 [file peerj-cs-09-1519-s005.xlsx]

## Sheet: Sheet1
Residents No.	X coordinate	Y coordinate	Weight of cartons owned by residents(Kg)	Recycling price psychological expectations(CNY/Kg)
1	73	24	19	0.5
2	57	47	12	1
3	88	52	15	0.8
4	47	13	11	0.7
5	23	63	13	0.9
6	28	28	12	1.1
7	59	63	14	1
8	59	24	13	0.8
9	40	40	14	1
10	38	55	13	0.9
11	77	67	16	0.9
12	66	87	12	0.8
13	45	23	16	0.8
14	25	84	12	0.5
15	87	55	14	0.6
16	99	63	14	0.7
17	62	35	15	1.1
18	58	75	12	0.7
19	71	22	15	0.6
20	49	54	11	1.1
21	76	13	14	1
22	88	28	12	0.5
23	28	51	17	1
24	34	63	12	0.8
25	51	81	14	0.7
26	60	76	15	0.9
27	70	52	15	1.1
28	99	39	14	1
29	51	25	16	0.8
30	87	100	14	1
31	30	64	11	0.9
32	45	94	15	0.9
33	88	74	17	0.8
34	53	42	17	0.8
35	86	55	12	0.5
36	78	81	14	0.6
37	64	69	13	0.7
38	72	94	14	1.1
39	92	91	14	0.7
40	62	100	14	0.6
41	99	74	16	1.1
42	80	96	17	1
43	19	90	12	0.5
44	62	77	13	1
45	38	43	13	0.8
46	99	47	14	0.7
47	93	78	13	0.9
48	30	79	15	1.1
49	27	26	14	1
50	65	32	14	0.8
