# Supplementary material for: Optimization of carton recycling site selection using particle swarm optimization algorithm considering residents’ recycling willingness
Source: PeerJ Comput Sci. 2023 Aug 24;9:e1519. doi: 10.7717/peerj-cs.1519 (PMC10495949; doi:10.7717/peerj-cs.1519)
Supplement: Supplemental Information 6 [file peerj-cs-09-1519-s006.xlsx]

## Sheet: Sheet1
Residents No.	X coordinate	Y coordinate	Weight of cartons owned by residents(Kg)	Recycling price psychological expectations(CNY/Kg)
1	40	50	13	1.1
2	25	85	15	0.6
3	22	75	16	0.6
4	22	85	12	0.9
5	20	80	16	0.5
6	20	85	11	1.1
7	18	75	12	1.2
8	15	75	10	0.8
9	15	80	12	0.6
10	10	35	13	0.7
11	10	40	15	0.8
12	8	40	16	0.7
13	8	45	13	1
14	5	35	15	0.6
15	5	45	14	1
16	2	40	14	0.9
17	0	40	14	1.2
18	0	45	16	0.7
19	44	5	11	0.6
20	42	10	13	0.9
21	42	15	12	0.8
22	40	5	15	0.9
23	40	15	13	1
24	38	5	16	1.1
25	38	15	17	0.5
26	35	5	16	0.9
27	95	30	15	0.6
28	95	35	14	0.9
29	92	30	13	0.8
30	90	35	12	0.8
31	88	30	15	1
32	88	35	15	0.5
33	87	30	12	1
34	85	25	13	0.8
35	85	35	17	0.9
36	67	85	13	0.6
37	65	85	14	0.6
38	65	82	15	0.7
39	62	80	12	0.8
40	60	80	14	0.8
41	60	85	15	0.5
42	58	75	15	0.7
43	55	80	12	0.7
44	55	85	13	0.9
45	55	82	12	1
46	20	82	16	0.7
47	18	80	14	0.6
48	2	45	10	1.2
49	42	2	15	1.1
50	42	12	17	1.2
