# Supplementary material for: Optimization of carton recycling site selection using particle swarm optimization algorithm considering residents’ recycling willingness
Source: PeerJ Comput Sci. 2023 Aug 24;9:e1519. doi: 10.7717/peerj-cs.1519 (PMC10495949; doi:10.7717/peerj-cs.1519)
Supplement: Supplemental Information 7 [file peerj-cs-09-1519-s007.xlsx]

## Sheet: Sheet1
Residents number	x coordinate	y coordinate	Weight of cartons held（Kg）	Recycling price psychological expectations（CNY/Kg）
1	25	85	12	0.6
2	22	75	11	1
3	22	85	14	1
4	20	80	16	1.1
5	20	85	13	1.2
6	18	75	10	1.1
7	15	75	18	0.5
8	15	80	13	0.9
9	10	35	18	0.5
10	10	40	14	1.1
11	8	40	14	1
12	8	45	15	0.6
13	5	35	14	1.1
14	5	45	15	0.6
15	2	40	10	0.9
16	0	40	13	0.9
17	0	45	12	0.8
18	44	5	11	0.7
19	42	10	10	0.8
20	42	15	14	0.6
21	40	5	13	0.8
22	40	15	14	0.7
23	38	5	19	1
24	38	15	15	1.2
25	35	5	12	1.1
26	95	30	11	0.6
27	95	35	14	0.9
28	92	30	13	1.1
29	90	35	13	0.9
30	88	30	11	0.7
31	88	35	13	0.5
32	87	30	14	0.7
33	85	25	13	0.6
34	85	35	14	0.9
35	67	85	14	1.2
36	65	85	14	1
37	65	82	17	0.7
38	62	80	14	0.7
39	60	80	12	1
40	60	85	15	0.8
41	58	75	14	0.9
42	55	80	15	0.7
43	55	85	16	0.6
44	55	82	15	0.6
45	20	82	15	1
46	18	80	11	0.9
47	2	45	14	1
48	42	5	13	1.2
49	42	12	15	1.2
50	72	35	12	0.7
51	55	20	13	0.9
52	25	30	14	0.7
53	20	50	14	1.2
54	55	60	15	0.6
55	30	60	14	0.9
56	50	35	15	1.2
57	30	25	12	0.7
58	15	10	10	0.6
59	10	20	10	0.9
60	15	60	15	0.9
61	45	65	15	0.8
62	65	35	11	1.2
63	65	20	16	0.5
64	45	30	19	0.9
65	35	40	16	0.7
66	41	37	13	0.8
67	64	42	15	1
68	40	60	13	0.7
69	31	52	15	0.8
70	35	69	13	1.2
71	65	55	14	1.1
72	63	65	15	1
73	2	60	15	0.6
74	20	20	14	0.6
75	5	5	16	0.6
76	60	12	13	0.9
77	23	3	12	1
78	8	56	13	0.7
79	6	68	16	0.5
80	47	47	15	1.1
81	49	58	11	1.2
82	27	43	12	1.2
83	37	31	17	0.9
84	57	29	11	0.5
85	63	23	11	0.7
86	21	24	15	1.2
87	12	24	14	0.8
88	24	58	13	0.8
89	67	5	13	0.9
90	37	47	15	1.2
91	49	42	12	0.6
92	53	43	11	1.1
93	61	52	13	1
94	57	48	15	0.9
95	56	37	15	0.5
96	55	54	15	0.5
97	4	18	13	0.6
98	26	52	15	0.6
99	26	35	13	0.8
100	31	67	15	1.2
