# Supplementary material for: Optimization of carton recycling site selection using particle swarm optimization algorithm considering residents’ recycling willingness
Source: PeerJ Comput Sci. 2023 Aug 24;9:e1519. doi: 10.7717/peerj-cs.1519 (PMC10495949; doi:10.7717/peerj-cs.1519)
Supplement: Supplemental Information 8 [file peerj-cs-09-1519-s008.xlsx]

## Sheet: Sheet1
Residents No.	X coordinate	Y coordinate	Weight of cartons owned by residents(Kg)	Recycling price psychological expectations(CNY/Kg)
1	25	85	15	1
2	22	75	15	0.9
3	22	85	18	1.2
4	20	80	12	1.2
5	20	85	9	1
6	18	75	15	0.8
7	15	75	13	0.8
8	15	80	12	0.8
9	10	35	15	0.5
10	10	40	15	0.9
11	8	40	15	1.1
12	8	45	14	1.1
13	5	35	12	0.5
14	5	45	15	0.6
15	2	40	18	1.2
16	0	40	14	0.9
17	0	45	13	0.5
18	44	5	13	1.1
19	42	10	17	1.2
20	42	15	15	0.9
21	40	5	15	0.8
22	40	15	12	1.1
23	38	5	15	0.6
24	38	15	13	0.6
25	35	5	17	0.7
26	95	30	13	0.5
27	95	35	12	1.1
28	92	30	14	1.1
29	90	35	12	0.7
30	88	30	15	0.6
31	88	35	13	0.7
32	87	30	11	0.6
33	85	25	12	0.9
34	85	35	17	1.1
35	67	85	12	0.8
36	65	85	14	0.8
37	65	82	14	0.7
38	62	80	15	1
39	60	80	18	1.2
40	60	85	12	0.7
41	58	75	14	1.2
42	55	80	15	0.5
43	55	85	15	0.9
44	55	82	15	0.8
45	20	82	17	1.1
46	18	80	12	0.5
47	2	45	15	1
48	42	5	14	0.8
49	42	12	14	1.2
50	72	35	15	0.6
51	55	20	18	0.9
52	25	30	11	0.6
53	20	50	12	0.8
54	55	60	14	1.1
55	30	60	14	1.1
56	50	35	16	0.8
57	30	25	13	0.9
58	15	10	10	0.5
59	10	20	11	1
60	15	60	12	1.2
61	45	65	14	0.9
62	65	35	14	0.7
63	65	20	15	0.9
64	45	30	13	0.7
65	35	40	14	0.9
66	41	37	13	1.1
67	64	42	12	1
68	40	60	13	1.2
69	31	52	15	0.7
70	35	69	14	0.9
71	65	55	16	0.7
72	63	65	17	0.8
73	2	60	14	1.1
74	20	20	17	1
75	5	5	13	1.1
76	60	12	14	0.5
77	23	3	14	0.7
78	8	56	14	1.2
79	6	68	15	0.8
80	47	47	13	1
81	49	58	17	0.8
82	27	43	14	0.9
83	37	31	12	0.6
84	57	29	14	0.7
85	63	23	17	1.2
86	21	24	15	0.5
87	12	24	14	0.7
88	24	58	14	0.9
89	67	5	14	0.9
90	37	47	17	0.5
91	49	42	15	0.8
92	53	43	16	1
93	61	52	15	0.6
94	57	48	13	0.7
95	56	37	14	1.2
96	55	54	12	0.5
97	4	18	18	0.7
98	26	52	14	1
99	26	35	13	1.1
100	31	67	14	1
